# Supplementary material for: Comparative kinetics of SARS-CoV-2 anti-spike protein RBD IgGs and neutralizing antibodies in convalescent and naïve recipients of the BNT162b2 mRNA vaccine versus COVID-19 patients
Source: Springer Nature journal article supplement (doi:10.1186/s12916-021-02090-6), 2021-08-23
Supplement: MOESM1 [file 19591526]

# Additional Information

## Comparative kinetics of SARS-CoV-2 anti-spike protein RBD IgGs and neutralizing antibodies in convalescent and naïve recipients of the BNT162b2 mRNA vaccine *versus* COVID-19 patients

Ioannis P. Trougakos, Evangelos Terpos, Christina Zirou, Aimilia D. Sklirou, Filia Apostolakou, Sentiljana Gumeni, Ioanna Charitaki, Eleni-Dimitra Papanagnou, Tina Bagratuni, Christine-Ivy Liacos, Andreas Scorilas, Eleni Korompoki, Ioannis Papassotiriou, Efstathios Kastritis, Meletios A. Dimopoulos

### Figure Legends

**Figure S1. Anti-S-RBD IgGs and NAbs kinetics in vaccinated individuals at D1-D50.** Paired values of evolving anti-S-RBD IgGs and NAbs following BNT162b2 mRNA vaccination for P2 (see Fig. 2)/NEG groups.

**Figure S2. qRT-PCR positivity of individuals found positive or negative at D1 for anti-S-RBD-IgGs or NAbs.** Mean duration for donors of P1 group since testing  $6\pm 4.51$  months (range 1.5-11 months) and for all donors (P1/P2 groups)  $4.19\pm 3.44$  months (range 1.5-11 months).

**Figure S3.** Correlation of the anti-S-RBD IgGs and NAbs evolving titers at groups P1 and P2/NEG at D1, D22, D36 and D50. Values of anti-S-RBD IgGs and NAbs titers (each spot correspond to both values per donor) following vaccination at D1 (P1 group) and D22, D36 and D50 (P2/NEG donors). Correlation (R) and significance (P) values per analysis and time point are indicated.

**Figure S4.** Comparative analysis of sensitivity (%) and specificity (%) of anti-S-RBD IgGs (U/mL) values *versus* NAbs (%) inhibition levels of >30% (moderate protection), >50% (high protection) and >75% (very high protection). Donors (*n*) for each threshold in the NAbs assay are indicated in the upper right part of each graph. Area under the curve (AUC), Std. Error and Significance (P) are also shown. Values of the anti-S-RBD IgGs assay that predict NAbs inhibition values >30%, >50% and >75% (sensitivity >90%) are indicated at the lower left part of the Figure.

**Figure S5.** Anti-S-RBD IgGs kinetics in COVID-19 patients with moderate (groups 1a, 1b) and severe (group 2) disease at D1, D7 and D30. For the specific clinical characteristics per group see Table S2.

**Figure S6.** NAbs kinetics in COVID-19 patients with moderate (groups 1a, 1b) and severe (group 2) disease at D1, D7 and D30. The specific clinical characteristics per group are reported in Table S2.

**Figure S7.** Kinetics (median with 95% CI) of humoral responses [NAbs, (%) inhibition] at the indicated time points (D1 to M5) in vaccinated recipients (n=21) assayed at M5 for the presence of SARS-CoV-2 S protein specific T cells clones (see Fig. 5). M5, five-months post-vaccination.

## Tables

**Table S1.** BNT162b2 mRNA vaccinated participants (n=250).

|                                                  |                      |
|--------------------------------------------------|----------------------|
| <b>Mean Age ± SD (years)</b>                     | 48.14 ± 12.45(24-77) |
| <b>Median Age</b>                                | 49                   |
| <b>Gender</b>                                    |                      |
| Male (%)                                         | 91 (36.4%)           |
| Female (%)                                       | 159 (63.6%)          |
| <b>Hospitalization status</b>                    |                      |
| Never hospitalized (%)                           | 250 (100%)           |
| Hospitalized (%)                                 | -                    |
| Unknown if hospitalized (%)                      | -                    |
| <b>Sample Collection Dates</b>                   | January-April 2021   |
| <b>SARS-CoV-2 PCR Positivity</b>                 |                      |
| Positive                                         | 18 (7.2%)            |
| Negative                                         | 232 (92.8%)          |
| Not performed                                    | -                    |
| Unknown                                          | -                    |
| <b>NAbs assayed (all time points)</b>            | 250 (100%)           |
| <b>Anti-S-RBD IgGs assayed (all time points)</b> | 250 (100%)           |
| <b>BNT162b2 mRNA vaccination (both doses)</b>    | 250 (100%)           |

**Table S2.** COVID-19 hospitalized patients (n=60).

|                                                                                    |                              |
|------------------------------------------------------------------------------------|------------------------------|
| <b>Mean Age ± SD (years)</b>                                                       | 52.06 ± 11.53 (27-87)        |
| <b>Median Age</b>                                                                  | 53                           |
| <b>Gender</b>                                                                      |                              |
| Male (%)                                                                           | 38 (63.3%)                   |
| Female (%)                                                                         | 22 (36.7 %)                  |
| <b>Hospitalization status</b>                                                      |                              |
| Never hospitalized (%)                                                             | -                            |
| Hospitalized (%)                                                                   | 60 (100%)                    |
| Unknown if hospitalized (%)                                                        | -                            |
| <b>Sample Collection Dates</b>                                                     | February-April 2021          |
| <b>Multiple Time Point Donors (D10, D17, D39 from symptoms onset) (%)</b>          | 60 (100%)                    |
| <b>SARS-CoV-2 PCR Positivity</b>                                                   |                              |
| Positive                                                                           | 60 (100%)                    |
| Negative                                                                           | -                            |
| Not performed                                                                      | -                            |
| Unknown                                                                            | -                            |
| <b>Severity of disease</b>                                                         |                              |
| Moderate disease: No oxygenation (fever/other symptoms) (score 1a) (%); Median Age | 15 (7M/8F) (25%); 49 y.o.    |
| Moderate disease: Respiratory failure (up to MV: 40%) (score 1b) (%); Median Age   | 22 (13M/9F) (36.7%); 52 y.o. |

|                                                                                                |                                                                                                                                        |
|------------------------------------------------------------------------------------------------|----------------------------------------------------------------------------------------------------------------------------------------|
| Severe disease: Respiratory failure, oxygenation (MV 40%), HNFO, ICU (score 2) (%); Median Age | 23 (18M/5F) (38.3%); 56 y.o.                                                                                                           |
| <b>Days Post Symptom Onset at first collection (D1)</b>                                        |                                                                                                                                        |
| Score 1a (mean $\pm$ SD)                                                                       | 10.64 $\pm$ 4.14 (median 9)                                                                                                            |
| Score 1b (mean $\pm$ SD)                                                                       | 8.77 $\pm$ 3.26 (median 8)                                                                                                             |
| Score 2 (mean $\pm$ SD)                                                                        | 9.71 $\pm$ 2.28 (median 9)                                                                                                             |
| <b>Administered therapeutics</b>                                                               | Patients in groups 1b, 2:<br><br>Remdesivir, dexamethasone,<br><br>immunomodulators (i.e.,<br><br>anakinra, baricitinib, tocilizumab). |
| <b>Disease outcome</b>                                                                         |                                                                                                                                        |
| Recovery (%)                                                                                   | 59 (98.33%)                                                                                                                            |
| Death (%)                                                                                      | 1 (1.66%)                                                                                                                              |

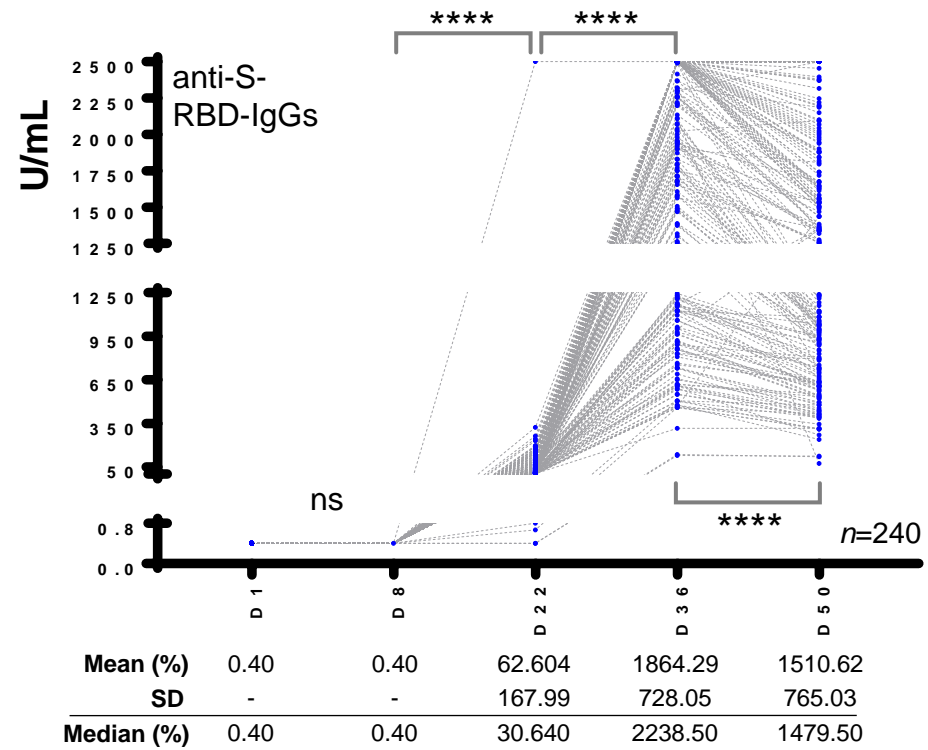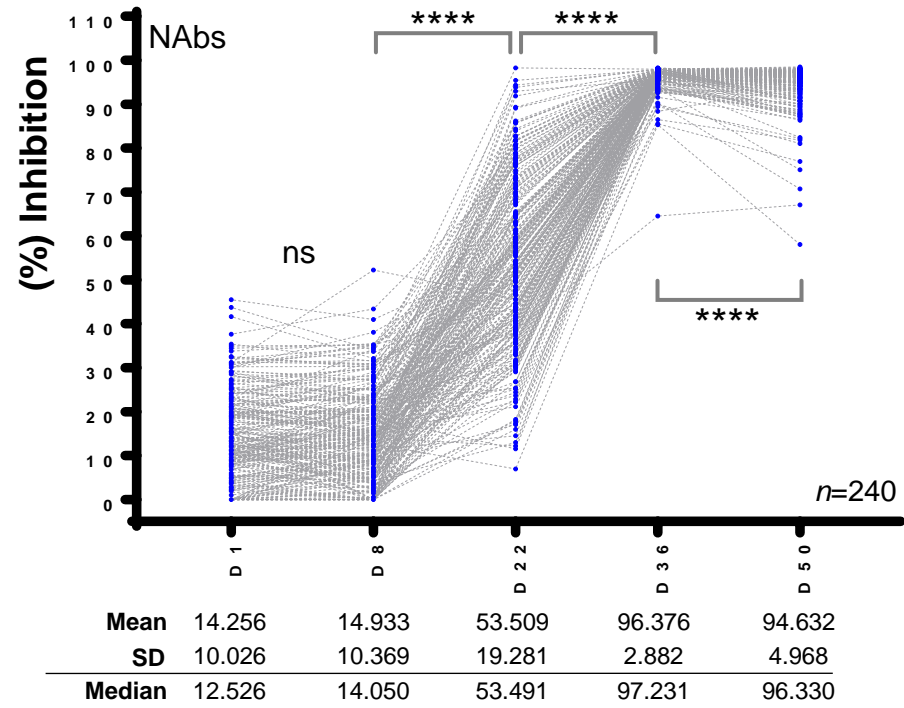

Fig. S1

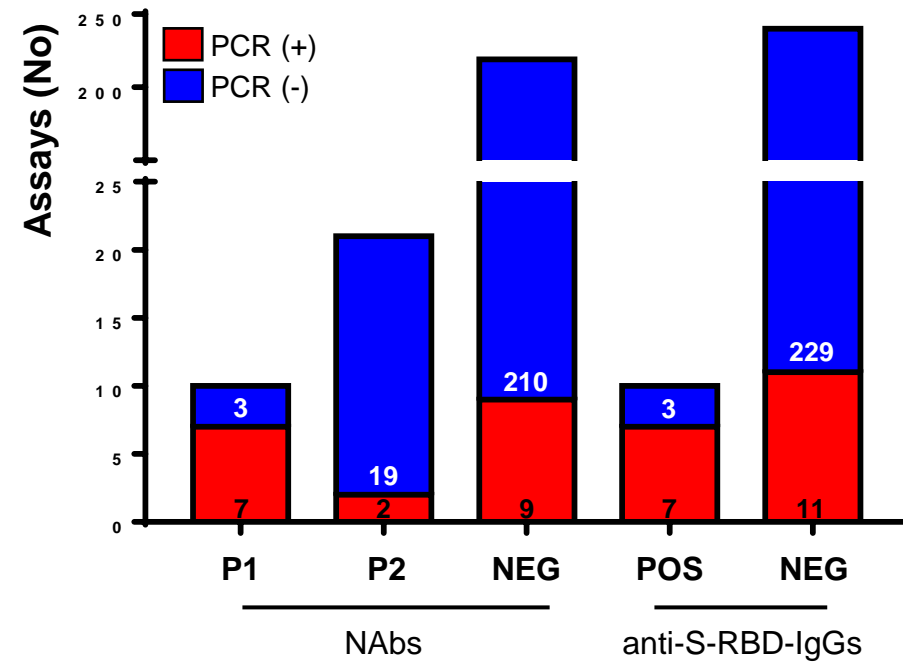

**Fig. S2**



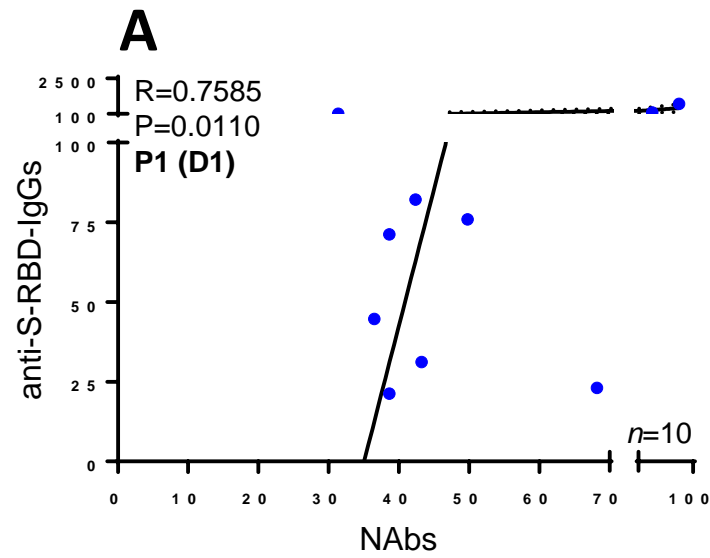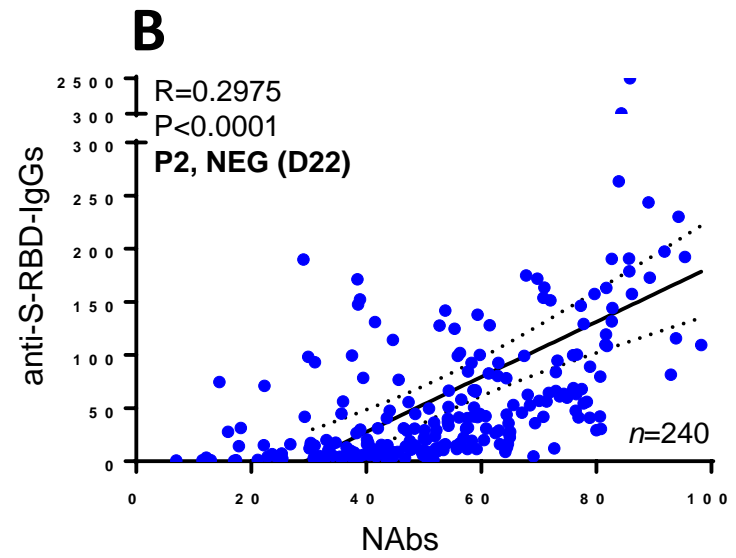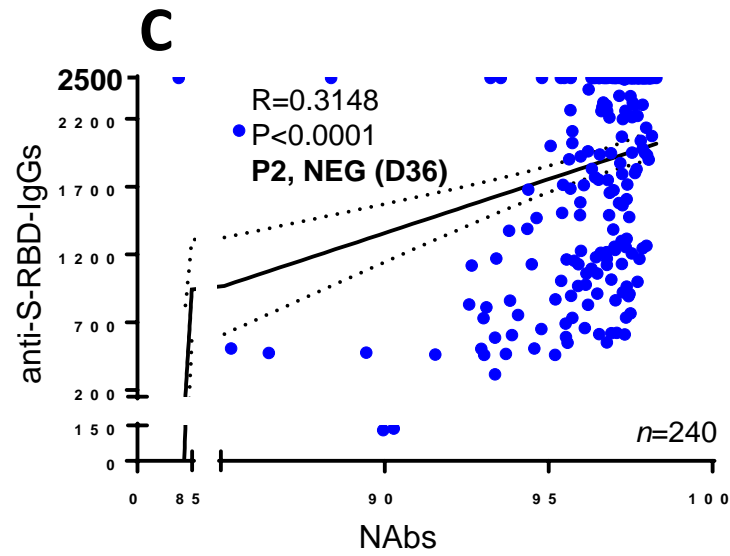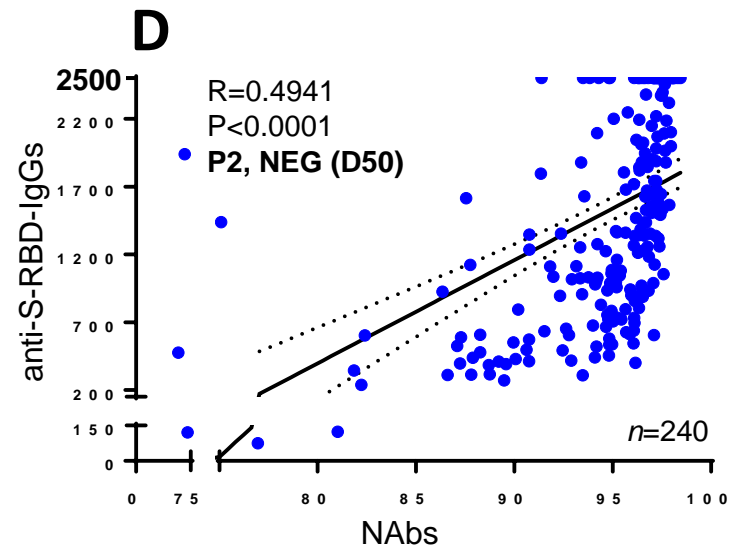

Regression slopes deviation from zero:  
 $P=0.0110$  (A),  $P<0.0001$  (B, C, D)

**Fig. S3**

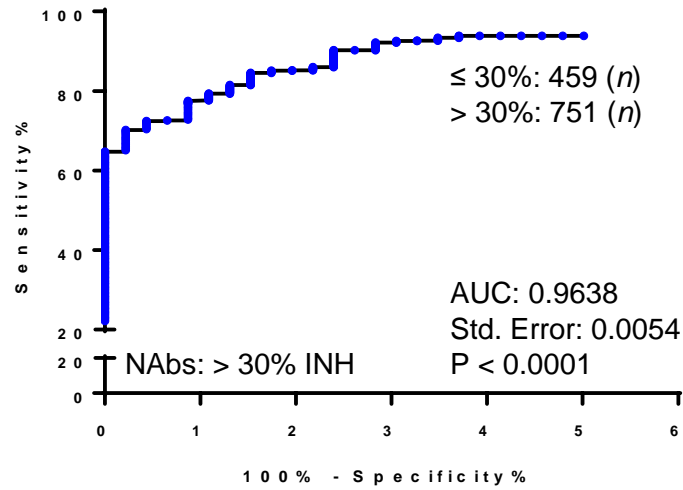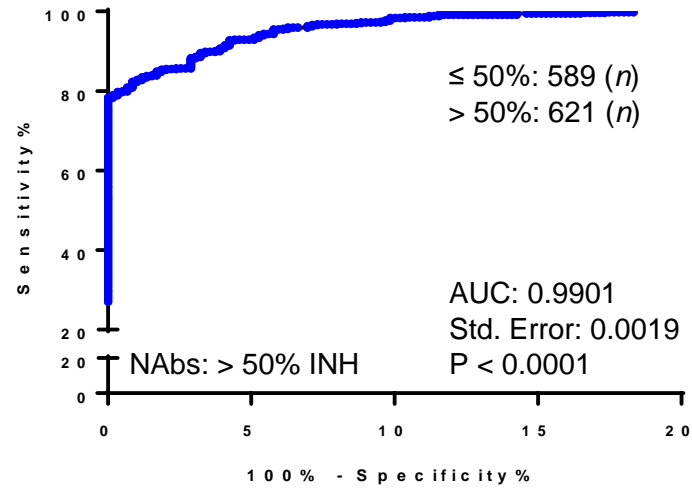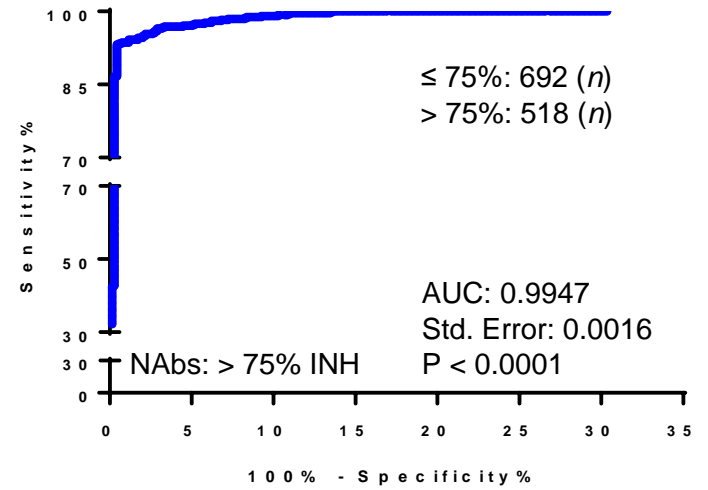

| Anti-S-RBD (U/mL) | Sensitivity% | 95% CI           | Specificity% | 95% CI           | Likelihood ratio | NAbs (% inhibition) |
|-------------------|--------------|------------------|--------------|------------------|------------------|---------------------|
| > 8.315           | 90.01        | 87.64% to 92.06% | 97.6         | 95.75% to 98.8%  | 37.56            | > 30%               |
| > 44.66           | 90.02        | 87.38% to 92.26% | 96.26        | 94.4% to 97.64%  | 24.1             | > 50%               |
| > 334.2           | 90.15        | 87.26% to 92.58% | 99.57        | 98.74% to 99.91% | 208              | > 75%               |

**Fig. S4**

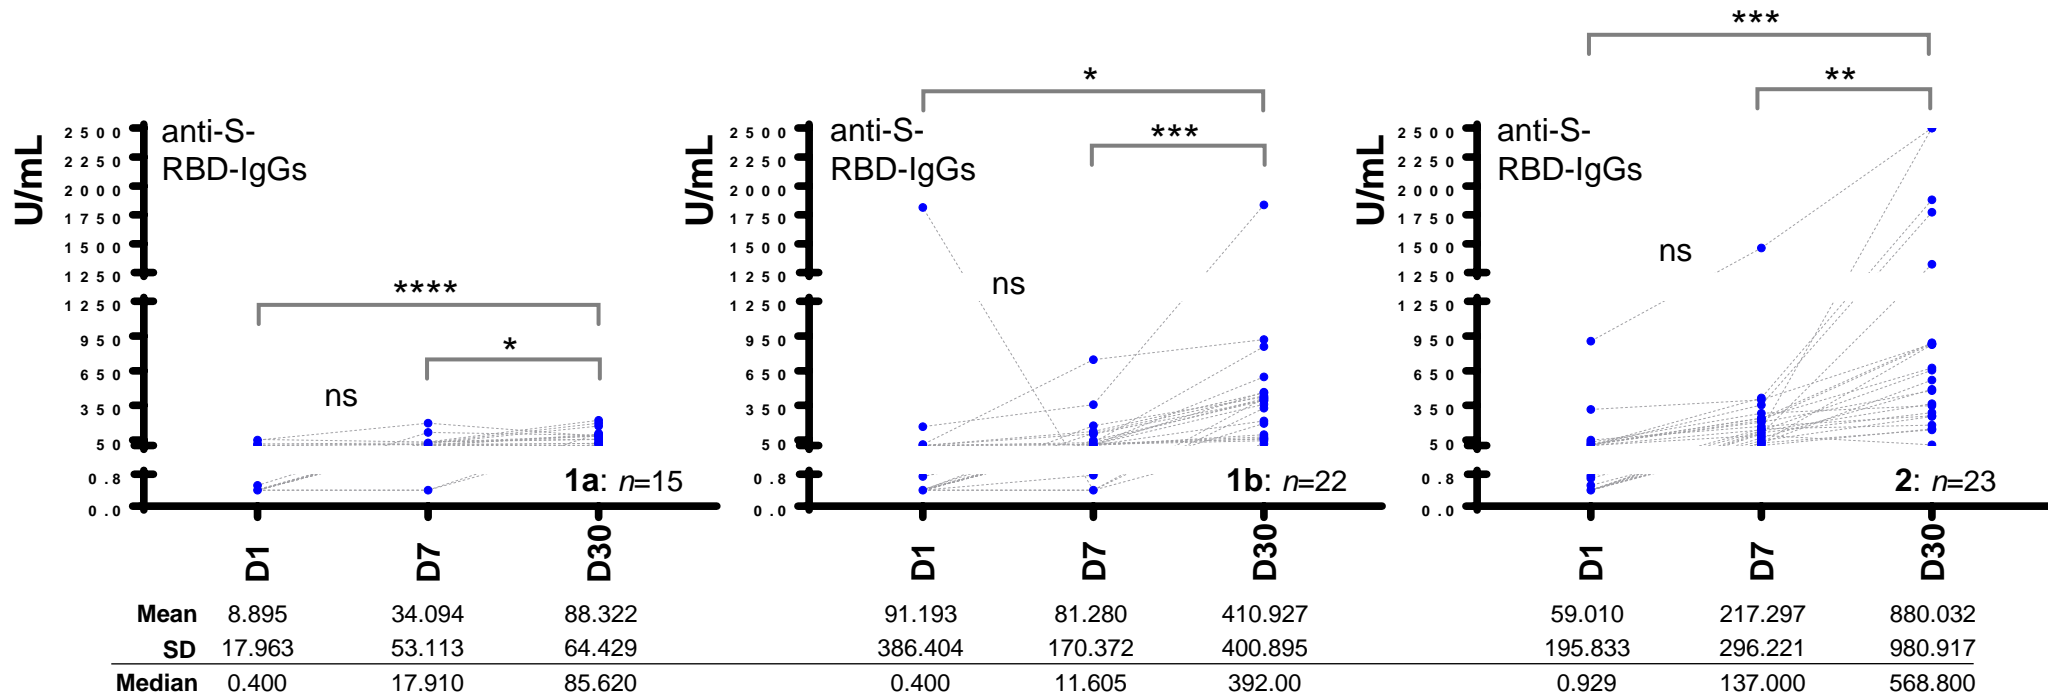

Fig. S5

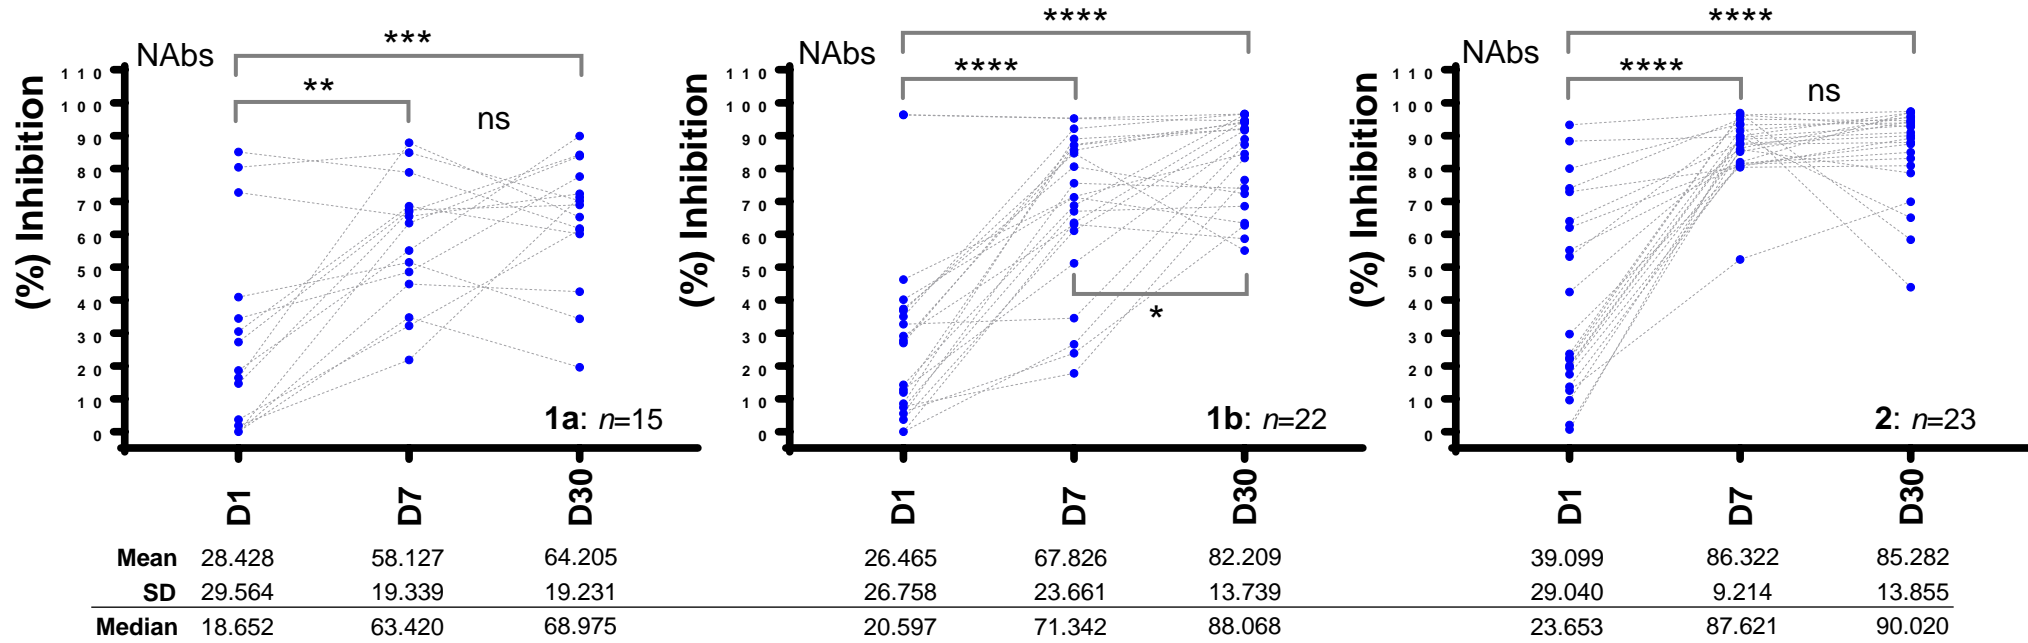

**Fig. S6**

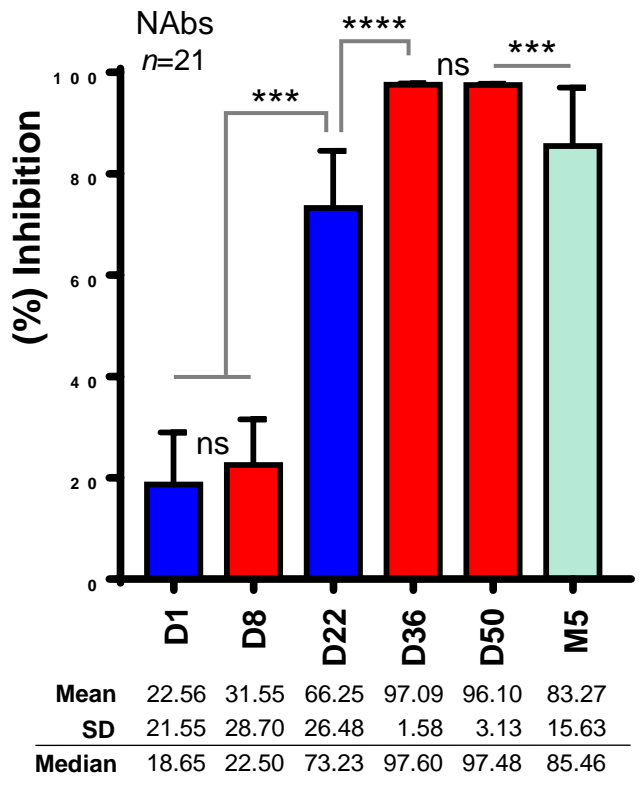

**Fig. S7**
